# Supplementary material
Source: publisher site journal article supplement (https://www.dovepress.com/article/245067)
Supplement: Supplementary file 1 [file get_supplementary_file.php]

**SUPPLEMENTAL MATERIAL**

**Table S1.** *International Classification of Diseases, Tenth Revision* (ICD-10) codes used to identify the comorbidities in the Charlson Comorbidity Index.

| Comorbidities | | ICD-10 codes |
| --- | --- | --- |
|  |  |
| Myocardial infarction | | I21;I22;I23 |
| Congestive heart failure | | I50; I11.0; I13.0; I13.2 |
| Peripheral vascular disease | | I70; I71; I72; I73; I74; I77 |
| Cerebrovascular disease | | I60-I69; G45; G46 |
| Dementia | | F00-F03; F05.1; G30 |
| Chronic pulmonary disease | | J40-J47; J60-J67; J68.4; J70.1; J70.3; J84.1; J92.0; J96.1; J98.2; J98.3 |
| Connective tissue disease | | M05; M06; M08; M09;M30;M31; M32; M33; M34; M35; M36; D86 |
| Ulcer disease | | K22.1; K25-K28 |
| Mild liver disease | | B18; K70.0-K70.3; K70.9; K71; K73; K74; K76.0 |
| Moderate/severe liver disease | | B15.0; B16.0; B16.2; B19.0; K70.4; K72; K76.6; I85 |
| Diabetes without complications | | E10.0, E10.1; E10.9; E11.0; E11.1; E11.9 |
| Diabetes with complications | | E10.2-E10.8; E11.2-E11.8 |
| Hemiplegia | | G81; G82 |
| Moderate/severe renal disease | | I12; I13; N00-N05; N07; N11; N14; N17-N19; Q61 |
| Malignant tumor | | C00-C75 |
| Leukemia | | C91-C95 |
| Lymphoma | | C81-C85; C88; C90; C96 |
| Metastatic cancer | | C76-C80 |
| HIV infection | | B21-B24 |

**Table S2.** Characteristics and 30-day mortality of the patients with and without platelet count measurement upon admission among the 37 239 adult patients hospitalized with pneumonia, North and Central Denmark, 2016-2012.

| Variables | | No platelet count measurement upon admission, n=8163 | Platelet count measurement upon admission, n=29 076 |
| --- | --- | --- | --- |
|  |  |
| Median age (Q1-Q3), years | | 73.3 (60.4-82.3) | 73.3 (60.45-82.7) |
| Men, n (%) | | 4374 (53.6) | 15 407 (53.0) |
| Charlson Comorbidity Index score | |  |  |
|  | 0, n (%) | 2225 (27.3) | 8981 (30.9) |
|  | 1-2, n (%) | 3270 (40.1) | 11 295 (38.8) |
|  | >2, n (%) | 2668 (32.7) | 8800 (30.3) |
| 30-day mortality | | 905 (11.1%) | 3354 (11.5%) |
